# Supplementary material
Source: publisher figshare collection journal article supplement (https://acs.figshare.com/ndownloader/files/5750619)
Supplement: Supplementary file 1 [file 5750619]

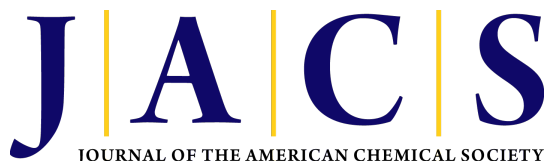

JOURNAL OF THE AMERICAN CHEMICAL SOCIETY

J. Am. Chem. Soc., 1996, 118(30), 7243-7244, DOI:[10.1021/ja961053c](https://doi.org/10.1021/ja961053c)

#### Terms & Conditions

Electronic Supporting Information files are available without a subscription to ACS Web Editions. The American Chemical Society holds a copyright ownership interest in any copyrightable Supporting Information. Files available from the ACS website may be downloaded for personal use only. Users are not otherwise permitted to reproduce, republish, redistribute, or sell any Supporting Information from the ACS website, either in whole or in part, in either machine-readable form or any other form without permission from the American Chemical Society. For permission to reproduce, republish and redistribute this material, requesters must process their own requests via the RightsLink permission system. Information about how to use the RightsLink permission system can be found at <http://pubs.acs.org/page/copyright/permissions.html>

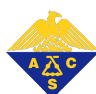

ACS Publications

MOST TRUSTED. MOST CITED. MOST READ.

Copyright © 1996 American Chemical Society

**Bis(2-nitrobenzyl) Vinylphosphonate (5).** Crude dichloride **4**<sup>1</sup> (620 mg, 2.75 mmol) was dissolved in 25 mL of pyridine at 0 °C and treated with a catalytic amount (~ 10 mg) of 4-dimethylaminopyridine and 1.40 g (9.15 mmol) of 2-nitrobenzyl alcohol. The resulting solution was stirred overnight at 25 °C and then treated with 200 mL of ethyl acetate. The solution was washed with 50 mL of saturated NaHCO<sub>3</sub> solution and then with 50 mL of saturated NaCl. The organic phase was dried (MgSO<sub>4</sub>) and then concentrated under diminished pressure. The residue was purified by flash chromatography<sup>2</sup> on a silica gel column (40 x 3 cm); elution with 1:1 hexane-ethyl acetate afforded bis(2-nitrobenzyl) vinylphosphonate (**5**) as a colorless oil: yield 400 mg (36% for two steps); silica gel TLC *R<sub>f</sub>* 0.22 (1:1 hexanes-ethyl acetate); <sup>1</sup>H NMR (CDCl<sub>3</sub>) δ 5.52 (d, 4H, *J* = 7.5 Hz), 6.28 (m, 3H), 7.51 (m, 2H), 7.68 (m, 4H), and 8.07 (m, 2H); mass spectrum (FAB), *m/z* 379; mass spectrum (FAB), *m/z* 379.069 (C<sub>16</sub>H<sub>16</sub>N<sub>2</sub>O<sub>7</sub>P requires 379.069).

**Ethyl 2-[(Diphenylmethylene)amino]-4-bis(2-nitrobenzylphosphono)butanoate (6).** Vinylphosphonate **5** (350 mg, 0.92 mmol) was dissolved in 5 mL of THF and the resulting solution was added slowly to a solution containing ethyl (N-diphenylmethylene)glycine (347 mg, 1.3 mmol) and 281 mg (1.48 mmol) of potassium bis(trimethylsilyl)amide in 15 mL of THF at -78 °C. The combined solution was stirred at -78 °C for an additional 3 h and then permitted to warm to 25 °C. Ethyl acetate (150 mL) was added and the combined solution was washed successively with 50-mL portions of saturated NaHCO<sub>3</sub> and saturated NaCl solutions. The organic phase was dried (MgSO<sub>4</sub>) and concentrated under diminished pressure. The residue was purified by flash chromatography on a silica gel column (40 x 3 cm); elution with 2:1 ethyl acetate-hexane afforded ethyl 2-[(diphenylmethylene)amino]-4-bis-(2-nitrobenzylphosphono)butanoate (**6**) as a colorless oil: yield 240 mg (40%); silica gel TLC *R<sub>f</sub>* 0.70 (ethyl acetate); <sup>1</sup>H NMR (CDCl<sub>3</sub>) δ 1.25 (t, 3H, *J* = 7.5 Hz), 2.06 (m, 2H), 2.27 (m, 2H), 4.12 (m, 3H), 5.47 (m, 4H), 7.16 (m, 2H), 7.50 (m, 14H) and 8.09

(m, 2H); mass spectrum (FAB),  $m/z$  646; mass spectrum (FAB),  $m/z$  646.194 ( $C_{33}H_{33}N_3O_9P$  requires 646.195).

**Ethyl 2-Amino-4-bis(2-nitrobenzylphosphono)butanoate (7).** Protected amino acid derivative **6** (210 mg, 0.325 mmol) was dissolved in 10 mL of ether and the solution was treated with 2 mL of 1 N HCl. The reaction mixture was stirred at 25 °C for 30 min and the pH of the aqueous phase was then adjusted to 4 by the addition of 1N NaOH. The reaction mixture was then treated with 30 mL of 1 N  $NaHSO_4$  and the aqueous phase was extracted with ethyl acetate. The combined organic phase was dried ( $MgSO_4$ ) and concentrated under diminished pressure. The residue was precipitated from ethyl acetate-hexane to afford **7** as a white powder: yield 72 mg (46%); silica gel TLC  $R_f$  0.10 (1:1 hexanes-ethyl acetate);  $^1H$  NMR (methanol- $d_4$ )  $\delta$  1.26 (t, 3H,  $J = 7.5$  Hz), 2.20 (m, 4H), 4.13 (m, 1H), 4.26 (q, 2H,  $J = 7.5$  Hz), 5.39 (m, 4H), 7.65 (m, 6H) and 8.03 (d, 2H,  $J = 8.5$  Hz).

**Ethyl 4-Bis(2-nitrobenzylphosphono)-2-[2-(nitro-veratryloxycarbonyl)amino]butanoate (8).** Amino acid derivative **7** (72 mg, 0.14 mmol) was dissolved in 5 mL of acetonitrile. This solution was treated with 98  $\mu$ L (0.56 mmol) of diisopropylethylamine, and then with 51 mg (0.185 mmol) of 2-nitroveratryl chloroformate in 5 mL of acetonitrile. The reaction mixture was stirred at 25 °C for 1 h. The reaction mixture was treated with 100 mL of ethyl acetate and washed successively with 30-mL portions of saturated  $NaHCO_3$  and saturated NaCl solutions. The organic phase was dried ( $MgSO_4$ ) and concentrated under diminished pressure. The residue was purified by flash chromatography on a silica gel column (25 x 3 cm); elution with 3:1 ethyl acetate-hexane afforded NVOC derivative **8** as a yellow powder: yield 80 mg (74%); silica gel TLC  $R_f$  0.40 (1:4 hexanes-ethyl acetate);  $^1H$  NMR ( $CDCl_3$ )  $\delta$  1.28 (t, 3H,  $J = 7.0$  Hz), 1.96 (m, 3H), 2.24 (m, 1H), 3.94 (s, 3H), 3.99 (s, 3H), 4.23 (q, 2H,  $J = 7.0$  Hz), 4.44 (m, 1H), 5.51 (m, 6H), 5.79 (d, 1H,  $J = 7.0$  Hz), 7.03 (s, 1H) 7.50 (m, 2H), 7.70 (m, 5H) and 8.08 (d, 2H,  $J = 7.5$  Hz); mass

spectrum (FAB),  $m/z$  721; mass spectrum (FAB),  $m/z$  721.173 ( $C_{30}H_{34}N_4O_{15}P$  requires 721.175).

#### **4-Bis(2-nitrobenzylphosphono)-2-**

**[nitroveratryloxycarbonyl)amino]butanoic acid (9).** Fully protected amino acid derivative **8** (80 mg, 0.11 mmol) was dissolved in 3 mL of THF and treated with 200  $\mu$ L of pyridine and 1.2 mL (0.12 mmol) of 0.1 N NaOH. The reaction mixture was stirred at 25 °C for 30 min, and the pH was then adjusted to 4 by the addition of 20 mL of 1 N  $NaHSO_4$  solution. The reaction mixture was extracted twice with 50-mL portions of ethyl acetate and the combined organic extract was dried ( $MgSO_4$ ) and concentrated. The residue was precipitated from ethyl acetate-hexane, affording 4-bis(2-nitrobenzylphosphono)-2-[2-(nitroveratryloxycarbonyl)amino]butanoic acid (**9**) as a white powder: yield 70 mg (92%); silica gel TLC  $R_f$  0.1 (ethyl acetate);  $^1H$  NMR ( $CDCl_3$ )  $\delta$  2.22 (m, 4H), 3.93 (s, 3H), 3.96 (s, 3H), 4.49 (m, 1H), 5.50 (m, 6H), 5.92 (d, 1H,  $J = 7.5$  Hz), 7.02 (s, 1H), 7.51 (m, 2H), 7.69 (m, 5H), and 8.10 (m, 2H); mass spectrum (FAB),  $m/z$  693; mass spectrum (FAB),  $m/z$  693.145 ( $C_{28}H_{30}N_4O_{15}P$  requires 693.144).

#### **Cyanomethyl 4-Bis(2-nitrobenzylphosphono)-2-[2-**

**(nitroveratryloxycarbonyl)amino]butanoate (10).** Amino acid derivative **9** (70 mg, 101  $\mu$ mol) was dissolved in 3 mL of  $CH_3CN$  and treated with 70  $\mu$ L (407  $\mu$ mol) of diisopropylethylamine followed by 50  $\mu$ L (115 mg, 0.69 mmol) of iodoacetonitrile. The reaction mixture was stirred at 25 °C for 12 h and then treated with 50 mL of ethyl acetate. The organic phase was washed successively with 15-mL portions of saturated  $NaHCO_3$  and saturated NaCl solutions, then dried ( $MgSO_4$ ) and concentrated under diminished pressure. The residue was purified by flash chromatography on a silica gel column (15 x 2 cm). Elution with ethyl acetate afforded cyanomethyl ester **10** as a white powder: yield 52 mg (70%); silica gel TLC  $R_f$  0.66 (ethyl acetate);  $^1H$  NMR ( $CDCl_3$ )  $\delta$  2.05 (m, 3H), 2.32 (m, 1H), 3.95 (s, 3H), 4.00 (s, 3H), 4.40 (m, 1H), 4.76 (d, 1H,  $J = 16$  Hz), 4.85 (d, 1H,  $J = 16$  Hz), 5.50 (m, 6H), 5.90 (d, 1H,

$J = 8.5$  Hz), 7.02 (s, 1H), 7.51 (m, 2H), 7.70 (m, 5H) and 8.09 (m, 2H); mass spectrum (FAB),  $m/z$  732, mass spectrum (FAB),  $m/z$  732.153 ( $C_{30}H_{31}N_5O_{15}P$  requires 732.155).

**4-Bis(2-nitrobenzylphosphono)-2-[2-**

**nitroveratryloxycarbonyl)amino]butanoic Acid pdCpA Ester (11).** A solution of the tris(tetrabutylammonium) salt of pdCpA<sup>3</sup> (4.1 mg, 3  $\mu$ mol) dissolved in 50  $\mu$ L of freshly distilled DMF was added to a conical, flame-dried vial containing activated ester **10** (20 mg, 27  $\mu$ mol). The reaction mixture was stirred at 25 °C and monitored by hplc. Four- $\mu$ L aliquots were removed periodically and diluted with 40  $\mu$ L of 50 mM  $NH_4OAc$ , pH 4.5; 10  $\mu$ L of each aliquot was analyzed on a 3  $\mu$ m,  $C_{18}$  reverse phase column (100 x 4.6 mm). The column was washed with 1  $\rightarrow$  65%  $CH_3CN$  in 50 mM  $NH_4OAc$ , pH 4.5, over 45 min at a flow rate of 1 mL/min (monitoring at 260 nm); the desired product had a retention time of 28.7 min. After 1 h, the reaction mixture was diluted with 600  $\mu$ L of 1:1  $CH_3CN$ -50 mM  $NH_4OAc$ , pH 4.5, and then separated by  $C_{18}$  reverse phase hplc on a semi-preparative column (250 x 10 mm) using the same gradient described above at a flow rate of 4 mL/min. Fully protected dinucleotide derivative **11** was recovered from the relevant fractions by lyophilization as a white solid: yield 3.2 mg (80%); mass spectrum (ESI, negative mode),  $m/z$  1330.

**2-Amino-4-phosphonobutanoic Acid pdCpA Ester (12).** The photochemical deprotection of aminoacyl-pdCpA derivative **11** was carried out following literature precedent<sup>4</sup> by the use of a 500 W mercury-xenon lamp using Pyrex and water filters. The deblocking of **11** was monitored by  $C_{18}$  reverse phase hplc as described above for the formation of **11**. Dinucleotide **2** had a retention time of 6.9 min in this system; the deblocking was complete within 7.5 min.

**1,2,3,4,6-Penta-O-allyloxycarbonyl-D-glucopyranose (13).** To a solution of 1.0 g (5.6 mmol) of D-glucopyranose in 15 mL of THF was added 2.63 mL (2.7 mg, 33 mmol) of pyridine and 4.3 g (33 mmol) of allyl chloroformate at 0 °C with stirring. The reaction mixture was stirred at 0 °C for 1 h, then at reflux for an additional 5 h. The

cooled reaction mixture was filtered and the filtrate was concentrated under diminished pressure. The residue was purified by flash chromatography on a silica gel column (25 x 2 cm); elution was effected with 1:3 ethyl acetate-hexanes. 1,2,3,4,6-Penta-*O*-allyloxycarbonyl-D-glucopyranose (**13**) was isolated as a colorless oil from the appropriate fractions: yield 2.0 g (60%); silica gel TLC  $R_f$  0.45 (2:1 hexanes-ethyl acetate);  $^1\text{H}$  NMR ( $\text{CDCl}_3$ )  $\delta$  4.28 (m, 3H), 4.63 (d, 10H,  $J = 5.5$  Hz), 4.94 (dd, 1H,  $J = 10.5, 3.5$  Hz), 5.03 (t, 1H,  $J = 10.5$  Hz), 5.35 (m, 11H), 5.90 (m, 5H) and 6.30 (d, 1H,  $J = 3.5$  Hz); mass spectrum (chemical ionization),  $m/z$  559 ( $\text{M-C}_3\text{H}_5$ ) $^+$  and 515 ( $\text{M-CO}_2\text{C}_3\text{H}_5$ ) $^+$ ; mass spectrum (FAB),  $m/z$  623.158 ( $\text{C}_{26}\text{H}_{32}\text{O}_{16}\text{Na}$  requires 623.159).

**2,3,4,6-Tetra-*O*-allyloxycarbonyl- $\alpha$ -D-glucopyranosyl Bromide (**14**).** A solution containing 0.3 g (0.5 mmol) of 1,2,3,4,6-penta-*O*-allyloxycarbonyl-D-glucopyranose (**13**) in 5 mL of 33% HBr in glacial acetic acid was stirred at 0 °C for 4 h. The reaction mixture was then diluted with 100 mL of cold  $\text{CH}_2\text{Cl}_2$  and partitioned against 50 mL of ice water. The organic layer was washed successively with 25-mL portions of cold  $\text{NaHCO}_3$  solution, brine and water, and then dried ( $\text{Na}_2\text{SO}_4$ ). Following concentration of the organic phase under diminished pressure, the residue was purified by flash chromatography on a silica gel column (25 x 2 cm); elution with 1:3 ethyl acetate-hexanes provided glucopyranosyl bromide **14** as a viscous, colorless oil: yield 0.22 g (72%); silica gel TLC  $R_f$  0.48 (2:1 hexanes-ethyl acetate);  $^1\text{H}$  NMR ( $\text{CDCl}_3$ )  $\delta$  4.12 (dd, 1H,  $J = 14, 7$  Hz), 4.35 (m, 2H), 4.64 (d, 8H,  $J = 5$  Hz), 4.74 (dd, 1H,  $J = 10, 4$  Hz), 5.05 (t, 1H,  $J = 9.5$  Hz), 5.33 (m, 9H), 5.90 (m, 4H) and 6.57 (d, 1H,  $J = 4$  Hz); mass spectrum (chemical ionization),  $m/z$  581 and 579.

**[*N*-(2-Nitroveratryloxycarbonyl)-*O*-(2,3,4,6-tetra-*O*-allyloxycarbonyl- $\alpha$ -D-glucopyranosyl)]-L-serine Cyanomethyl Ester (**15**).** A stirred solution containing 0.05 g (0.13 mmol) of *N*-(2-nitroveratryloxycarbonyl)-L-serine cyanomethyl ester<sup>5</sup> in 2 mL of  $\text{CH}_2\text{Cl}_2$  at -20 °C containing 4 Å molecular sieves was treated with 110 mg (0.4 mmol) of silver trifluoromethanesulfonate. After 15 min at -20 °C, the reaction mixture was cooled to -78 °C and treated with a cold solution containing 70

mg (0.13 mmol) of glucopyranosyl bromide **14** in 3 mL of CH<sub>2</sub>Cl<sub>2</sub> with stirring. After 4 h, the stirred reaction mixture was diluted with 15 mL of CH<sub>2</sub>Cl<sub>2</sub> and filtered through a layer of silica gel, which was washed with ethyl acetate. The filtrate was concentrated under diminished pressure and the residue was applied to a silica gel flash chromatography column (15 x 1 cm). Elution with 1:2 ethyl acetate-hexanes provided glucosylated serine derivative **15** as a viscous, yellow oil: yield 58 mg (68%); silica gel TLC *R<sub>f</sub>* 0.39 (1:1 hexanes-ethyl acetate); <sup>1</sup>H NMR (CDCl<sub>3</sub>) δ 3.80 (m, 2H), 3.95 (s, 3H), 4.01 (s, 3H), 4.30 (m, 2H), 4.62 (m, 10H), 4.76 (m, 2H), 4.86 (d, 1H, *J* = 10 Hz) 4.92 (d, 1H, *J* = 10 Hz), 5.10 (t, 1H, *J* = 10 Hz), 5.30 (m, 8H), 5.47 (d, 1H, *J* = 15 Hz), 5.58 (d, 1H, *J* = 15 Hz), 5.63 (d, 1H, *J* = 15 Hz), 5.77 (d, 1H, *J* = 8.5 Hz), 5.85 (m, 4H), 7.05 (s, 1H) and 7.72 (s, 1H); mass spectrum (FAB), *m/z* 882.242 (C<sub>37</sub>H<sub>44</sub>N<sub>3</sub>O<sub>22</sub> requires 882.242).

**[*N*-(2-Nitroveratryloxycarbonyl)-*O*-(α-D-glucopyranosyl)]-L-serine pdCpA Ester (**17**).** The reaction mixture contained 4 mg (2.75 μmol) of the tris(tetrabutylammonium) salt of pdCpA<sup>3</sup> and 11.6 mg (13.7 μmol) of glucosylated serine derivative **15** in 50 μL of dry DMF under argon at 25 °C. The course of the reaction was monitored by hplc. Ten-μL aliquots were removed periodically and diluted with 90 μL of 1:1 CH<sub>3</sub>CN-50 mM NH<sub>4</sub>OAc, pH 4.5; 10 μL of each diluted aliquot was assayed on a 3 μm, C<sub>18</sub> reverse phase column (Alltech). The column was washed with 1 → 65% CH<sub>3</sub>CN in 50 mM NH<sub>4</sub>OAc, pH 4.5, over 45 min at a flow rate of 1 mL/min (monitoring at 260 nm); the desired product had a retention time of 28 min. After 4 h, the reaction mixture was purified on a semi-preparative C<sub>18</sub> reverse phase column (10 μm) using the same gradient. The fully blocked *O*-glucosylseryl pdCpA derivative **16** was obtained as a pale yellow foam: yield 0.6 mg (14 A<sub>260</sub> units); λ<sub>max</sub> (H<sub>2</sub>O) 345, 260 (sh) and 249 nm.

A suspension containing 0.6 mg of *O*-glucosylseryl pdCpA derivative **16** and 0.6 mg of palladium tetrakis(triphenylphosphine) in 50 μL of THF was treated with 2 μL (2.3 mg, 0.05 mmol) of formic acid and 5 μL (3.7 mg, 0.05 mmol) of *n*-butylamine. The

reaction mixture was stirred at room temperature; aliquots were removed periodically, diluted 10-fold with 1:1 CH<sub>3</sub> CN-50 mM NH<sub>4</sub>OAc, pH 4.5, and assayed for removal of the allyloxycarbonyl protecting groups by C<sub>18</sub> reverse phase hplc as described above. The fully *O*-deblocked product had a retention time of 20 min in this system and its formation was judged to be optimal after 12 h. The reaction mixture was purified by hplc on a semi-preparative C<sub>18</sub> reverse phase column using the same conditions described above. Deblocked *O*-glucosylseryl pdCpA derivative **17** was isolated as a pale yellow foam, yield 3 A<sub>260</sub> units;  $\lambda_{\text{max}}$  (H<sub>2</sub>O) 345, 260 (sh) and 249 nm; <sup>1</sup>H NMR (D<sub>2</sub>O)  $\delta$  1.8 (m, 2H), 2.17 (m, 2H), 3.55 (m, 2H), 3.72 (s, 3H), 3.8 (m, 3H), 3.90 (s, 3H), 3.95-4.4 (m, 11H), 5.47 (m, 2H), 6.0 (m, 4H), 7.06 (s, 0.5H), 7.60 (s, 0.5H), 7.62 (s, 1H), 7.81 (m, 1H), 7.96 (s, 1H), 8.14 (s, 0.5H) and 8.47 (s, 0.5H); mass spectrum (ESI, negative mode), *m/z* 1123.

**[*O*-( $\alpha$ -D-Glucopyranosyl)]-L-serine pdCpA Ester.** *N*-Deblocking of aminoacylated dinucleotide **16** was carried out immediately prior to ligation of the deprotected product to an abbreviated tRNA transcript. Dinucleotide **17** (0.5 A<sub>260</sub> unit) was dissolved in 50  $\mu$ L of 1 mM KOAc, pH 5.0, and irradiated with a 500 W mercury-xenon lamp using Pyrex and water filters. The deblocking of **17** was carried out for 2 min; formation of the desired product was verified by hplc analysis.



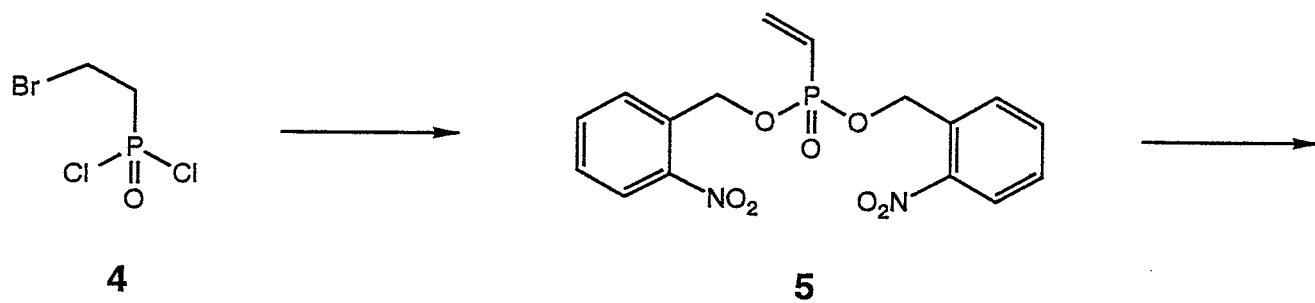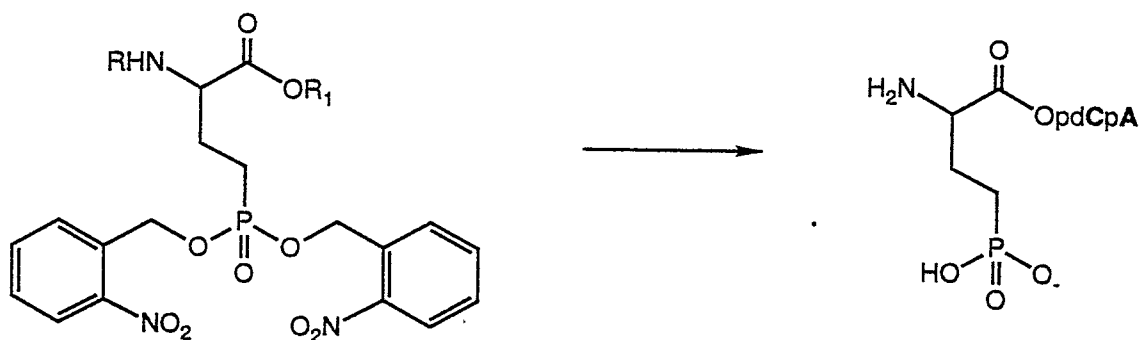

**6**  $R = (C_6H_5)_2CH=$ ,  $R_1 = Et$

**7**  $R = H$ ,  $R_1 = Et$

**8**  $R = NVOC$ ,  $R_1 = Et$

**9**  $R = NVOC$ ,  $R_1 = H$

**10**  $R = NVOC$ ,  $R_1 = CH_2CN$

**11**  $R = NVOC$ ,  $R_1 = pdCpA$

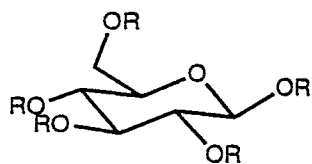

**13**  $R = \text{CH}_2=\text{CHCH}_2\text{OCO}$

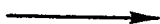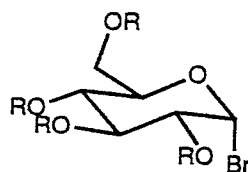

**14**  $R = \text{CH}_2=\text{CHCH}_2\text{OCO}$

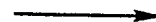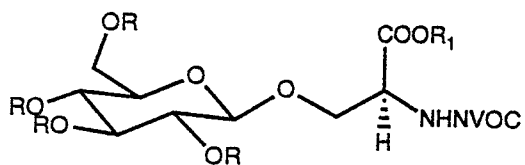

**15**  $R = \text{CH}_2=\text{CHCH}_2\text{OCO}$ ,  $R = \text{CH}_2\text{CN}$

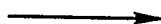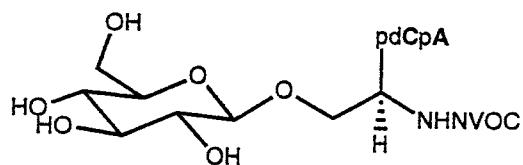

**17**

**16**  $R = \text{CH}_2=\text{CHCH}_2\text{OCO}$ ,  $R = \text{pdCpA}$

## References

- (1) van der Klein, P. A. M.; Dreef, C. E.; van der Marel, G. A.; van Boom, J. H. *Tetrahedron Lett.* **1989**, *30*, 5473.
- (2) Stille, W. C.; Kahn, J.; Mitra, A. *J. Org. Chem.* **1978**, *43*, 2923.
- (3) Robertson, S. A.; Noren, C. J.; Anthony-Cahill, J.; Griffith, M. C.; Schultz, P. G. *Nucleic Acids Res.* **1989**, *17*, 9649.
- (4) Robertson, S. A.; Ellman, J. A.; Schultz, P. G. *J. Am. Chem. Soc.* **1991**, *115*, 2722.
- (5) Crasto, C. Ph.D. Thesis, University of Virginia, 1995.
